# Supplementary material for: Efficient estimation of generalized linear latent variable models
Source: PLOS journal article supplement (doi:10.1371/journal.pone.0216129), 2019-05-01
Supplement: S1 (10.1371/journal.pone.0216129.s001) [file journal.pone.0216129.s001]

## S1 Appendix. Proof of the variational approximation of the likelihood of GLLVMs

Assume that the responses come from the exponential family of distributions with density  $f(y_{ij}|\mathbf{u}_i^*, \Psi) = \exp\{(y_{ij}\eta_{ij} - b(\eta_{ij}))/\phi_j + c(y_{ij}, \phi_j)\}$ . The variational approximation for the marginal log-likelihood is then obtained as follows

$$\begin{aligned}\underline{\ell}(\Psi, \xi) &= \sum_{i=1}^n \int \log \left\{ \frac{f(\mathbf{y}_i|\mathbf{u}_i^*, \Psi)f(\mathbf{u}_i^*)}{q^*(\mathbf{u}_i^*|\xi)} \right\} q^*(\mathbf{u}_i^*|\xi) d\mathbf{u}_i^*, \\ &= \sum_{i=1}^n \int \{\log f(\mathbf{y}_i|\mathbf{u}_i^*, \Psi) + \log f(\mathbf{u}_i^*) - \log q^*(\mathbf{u}_i^*|\xi)\} q^*(\mathbf{u}_i^*|\xi) d\mathbf{u}_i^*, \\ &= \sum_{i=1}^n \left( E_{q^*} \{\log f(\mathbf{y}_i|\mathbf{u}_i^*, \Psi)\} + E_{q^*} \{\log f(\mathbf{u}_i^*)\} + E_{q^*} \{-\log q^*(\mathbf{u}_i^*|\xi)\} \right),\end{aligned}$$

where  $E_{q^*}$  is expectation with respect to variational density  $q^*$ . Expectation  $E_{q^*} \{-\log q^*(\mathbf{u}_i^*|\xi)\}$  is the definition to the entropy of  $q^*(\mathbf{u}_i^*|\xi)$  which equals to  $\log \det(2\pi e \mathbf{A}_i)/2$ . When we omit all quantities constant with respect to the parameters, the above equals to

$$\begin{aligned}\underline{\ell}(\Psi, \xi) &= \sum_{i=1}^n \sum_{j=1}^m \left\{ \frac{y_{ij}\tilde{\eta}_{ij} - E_{q^*}\{b(\eta_{ij})\}}{\phi_j} + c(y_{ij}, \phi_j) \right\} \\ &\quad + \frac{1}{2} \sum_{j=1}^n \left\{ \log \det \mathbf{A}_i - E_{q^*} \{ \mathbf{u}_i^{*'} \mathbf{C}_{\sigma^2}^{-1} \mathbf{u}_i^* + \log \det(\mathbf{C}_{\sigma^2}) \} \right\} \\ &= \sum_{i=1}^n \sum_{j=1}^m \left\{ \frac{y_{ij}\tilde{\eta}_{ij} - E_{q^*}\{b(\eta_{ij})\}}{\phi_j} + c(y_{ij}, \phi_j) \right\} \\ &\quad + \frac{1}{2} \sum_{i=1}^n \left( \log \det(\mathbf{A}_i) - \text{tr}(\mathbf{C}_{\sigma^2}^{-\frac{1}{2}} \mathbf{A}_i \mathbf{C}_{\sigma^2}^{-\frac{1}{2}}) - \mathbf{a}_i' \mathbf{C}_{\sigma^2}^{-1} \mathbf{a}_i - \log \det(\mathbf{C}_{\sigma^2}) \right) \\ &= \sum_{i=1}^n \sum_{j=1}^m \left\{ \frac{y_{ij}\tilde{\eta}_{ij} - E_{q^*}\{b(\eta_{ij})\}}{\phi_j} + c(y_{ij}, \phi_j) \right\} \\ &\quad + \frac{1}{2} \sum_{i=1}^n \left( \log \det(\mathbf{A}_i) - \text{tr}(\mathbf{C}_{\sigma^2}^{-1} \mathbf{A}_i) - \mathbf{a}_i' \mathbf{C}_{\sigma^2}^{-1} \mathbf{a}_i - \log \det(\mathbf{C}_{\sigma^2}) \right),\end{aligned}$$

where  $\tilde{\eta}_{ij} = a_{\alpha i} + \beta_{0j} + \mathbf{x}_i' \boldsymbol{\beta}_j + \mathbf{a}_{\mathbf{u}_i'}' \boldsymbol{\gamma}_j$ ,  $\mathbf{C}_{\sigma^2}$  is block diagonal matrix of  $\sigma^2$  and  $\mathbf{I}_d$  and  $\mathbf{u}_i^* = (\alpha_i, \mathbf{u}_i')'$ . Notation  $\mathbf{C}_{\sigma^2}^{-1/2}$  is the square root of  $\mathbf{C}_{\sigma^2}^{-1}$  which means  $\mathbf{C}_{\sigma^2}^{-\frac{1}{2}} \mathbf{C}_{\sigma^2}^{-\frac{1}{2}} = \mathbf{C}_{\sigma^2}^{-1}$ . This operation is possible when  $\mathbf{C}_{\sigma^2}$  is diagonal matrix.
